# Supplementary material
Source: HighWire-hosted journal article supplement (https://erj.ersjournals.com/content/52/1/1800740)
Supplement: inline-supplementary-material-1 [file inline-supplementary-material-1.pdf]

**Supplementary Table S1.** Demographic and clinical characteristics across obstructive sleep apnoea severity groups as defined by the apnoea-hypopnoea index.

| AHI CATEGORY                | Non<br>N=20 | Mild<br>N=30 | Moderate<br>N=17 | Severe<br>N=16 | Total<br>N=83 |                                                                  |
|-----------------------------|-------------|--------------|------------------|----------------|---------------|------------------------------------------------------------------|
| Age                         | 63.8 ± 7.6  | 67.8 ± 7     | 70.4 ± 8.4       | 67.9 ± 6.2     | 67.4 ± 7.5    | *moderate>non                                                    |
| Education, years            | 12.7 ± 2.2  | 14.2 ± 3.9   | 13.1 ± 3         | 12.8 ± 3.3     | 13.3 ± 3.2    |                                                                  |
| BMI (kg/m <sup>2</sup> )    | 27.3 ± 6.1  | 26.5 ± 8.9   | 29 ± 4.4         | 30.9 ± 4.6     | 28 ± 6.9      |                                                                  |
| MMSE                        | 29.2 ± 0.8  | 28.5 ± 1.8   | 27.9 ± 2.1       | 28.8 ± 1.1     | 28.6 ± 1.6    |                                                                  |
| CIRS                        | 4.4 ± 4.2   | 4.8 ± 3.4    | 4.1 ± 3.6        | 5.8 ± 4.0      | 4.8 ± 3.8     |                                                                  |
| Alcohol                     | 3.4 ± 3.5   | 6.8 ± 8.0    | 3.2 ± 4.7        | 4.2 ± 8.9      | 4.7 ± 6.8     |                                                                  |
| GDS                         | 5.1 ± 3.9   | 3.8 ± 3.3    | 2.9 ± 2.8        | 4.7 ± 4.5      | 4.1 ± 3.6     |                                                                  |
| ESS                         | 8.9 ± 5.9   | 7.6 ± 4      | 6.5 ± 3.2        | 7.7 ± 4.6      | 7.6 ± 4.4     |                                                                  |
| ODI (n/hr)                  | 4.3 ± 3.9   | 7.4 ± 6.7    | 14.2 ± 10        | 43.8 ± 25      | 15.1 ± 19.1   | **severe>non **severe>mild<br>**severe>moderate                  |
| SpO <sub>2</sub> lowest, %  | 89.4 ± 3.4  | 86.5 ± 6.2   | 83.4 ± 6.3       | 81.6 ± 5.6     | 85.6 ± 6.1    | **severe>non *severe>mild                                        |
| SpO <sub>2</sub> <90%, %TST | 1.6 ± 4.3   | 2.6 ± 5.1    | 4.6 ± 4.9        | 10.9 ± 14.3    | 4.4 ± 8.2     | **severe>non **severe>mild                                       |
| Sleep Efficiency, %         | 80.3 ± 7.8  | 74.1 ± 12.9  | 76.1 ± 9         | 72.4 ± 16.3    | 75.7 ± 12.1   |                                                                  |
| Awakening Index (n/hr)      | 4 ± 1.6     | 7.1 ± 8.4    | 5.4 ± 1.9        | 10.4 ± 9.1     | 6.6 ± 6.8     | *severe>non                                                      |
| Arousal Index (n/hr)        | 10.2 ± 3.3  | 15.6 ± 5.7   | 20.8 ± 15.7      | 38.6 ± 17.6    | 19.8 ± 14.7   | *moderate>non<br>**severe>non **severe>mild<br>**severe>moderate |
| RAVLT, z-score              | 0.3 ± 1.2   | 0.1 ± 1.0    | -0.5 ± 1.3       | -0.1 ± 1.0     | 0.0 ± 1.1     |                                                                  |
| Females, n (%)              | 15 (75)     | 19 (63.3)    | 10 (62.5)        | 9 (52.9)       | 53 (63.9)     |                                                                  |
| Diabetes, n (%)             | 3 (15)      | 4 (13.3)     | 2 (12.5)         | 2 (11.8)       | 11 (13.3)     |                                                                  |
| HTN, n (%)                  | 9 (45)      | 8 (26.7)     | 11 (68.8)        | 8 (47.1)       | 36 (43.4)     |                                                                  |
| CVD, n (%)                  | 4 (20)      | 8 (26.7)     | 2 (12.5)         | 1 (5.9)        | 15 (18.1)     |                                                                  |
| MD, n (%)                   | 4 (20)      | 4 (13.3)     | 1 (6.3)          | 3 (17.6)       | 12 (14.5)     |                                                                  |
| Diabetes medication, n (%)  | 0 (0)       | 4 (13.3)     | 1 (6.3)          | 2 (11.8)       | 7 (8.4)       |                                                                  |
| HTN medication, n (%)       | 8 (40)      | 6 (20)       | 10 (62.5)        | 7 (41.2)       | 31 (37.3)     |                                                                  |
| Antidepressants, n (%)      | 8 (40)      | 8 (26.7)     | 4 (25)           | 7 (41.2)       | 27 (32.5)     |                                                                  |
| MCI, n (%)                  | 16 (80)     | 21 (70)      | 14 (87.5)        | 11 (64.7)      | 62 (74.7)     |                                                                  |

BMI = body mass index; MMSE = mini mental state examination; CIRS = cumulative illness rating scale; GDS = geriatric depression scale; ESS = Epworth sleepiness scale; ODI = oxygen desaturation index; SpO<sub>2</sub> = saturation of oxygen; RAVLT = Rey auditory verbal learning task; HTN = hypertension; CVD = cardiovascular disease; MD = major depression; MCI = mild cognitive impairment; \*p<0.05, \*\*p<0.01

**Supplementary Table S2.** Demographic and clinical characteristics between subjects with mild cognitive impairment and those without.

|                             | MCI<br>N=62        | Non-MCI<br>N=21    | Sig.         |
|-----------------------------|--------------------|--------------------|--------------|
| Age                         | 67.4 ± 7.8         | 67.3 ± 7.5         | 0.975        |
| Females, n (%)              | 38 (61.3)          | 15 (71.4)          | 0.403        |
| Education, years            | 12.9 ± 3.3         | 13.5 ± 3.3         | 0.465        |
| BMI                         | 26.2 ± 5.3         | 28.8 ± 7.3         | 0.159        |
| MMSE                        | 28.4 ± 1.7         | 28.6 ± 1.6         | 0.625        |
| GDS                         | 3.4 ± 2.9          | 4.3 ± 3.9          | 0.352        |
| ESS                         | 7.3 ± 4.6          | 7.8 ± 4.4          | 0.672        |
| ODI (n/hr)                  | 18.2 ± 24.7        | 14 ± 16.9          | 0.390        |
| SpO <sub>2</sub> lowest, %  | 86.5 ± 6.5         | 85.3 ± 6           | 0.433        |
| SpO <sub>2</sub> <90%, %TST | 4.3 ± 8.8          | 4.4 ± 8.1          | 0.978        |
| Sleep Efficiency, %         | <b>70.4 ± 12.4</b> | <b>77.5 ± 11.5</b> | <b>0.020</b> |
| Awakening Index (n/hr)      | 8.1 ± 6.7          | 6.1 ± 6.8          | 0.241        |
| Arousal Index (n/hr)        | 25 ± 21.3          | 18.1 ± 11.4        | 0.168        |
| <b>RAVLT, z-score</b>       | <b>0.5 ± 1</b>     | <b>-0.2 ± 1.1</b>  | <b>0.010</b> |
| Diabetes, n (%)             | 2 (3.2)            | 9 (42.9)           | 0.560        |
| HTN, n (%)                  | 8 (12.9)           | 28 (133.3)         | 0.534        |
| CVD, n (%)                  | 4 (6.5)            | 11 (52.4)          | 0.869        |
| MDE, n (%)                  | 3 (4.8)            | 9 (42.9)           | 0.979        |
| Diabetes Medication, n (%)  | 2 (3.2)            | 5 (23.8)           | 0.835        |
| HTN Medication, n (%)       | 8 (12.9)           | 23 (109.5)         | 0.975        |
| Antidepressants, n (%)      | 5 (8.1)            | 22 (104.8)         | 0.324        |

BMI = body mass index; MMSE = mini mental state examination; CIRS = cumulative illness rating scale; GDS = geriatric depression scale; ESS = Epworth sleepiness scale; ODI = oxygen desaturation index; SpO<sub>2</sub> = saturation of oxygen; RAVLT = Rey auditory verbal learning task; HTN = hypertension; CVD = cardiovascular disease; MD = major depression; MCI = mild cognitive impairment; \*p<0.05, \*\*p<0.01
